1                                   **Paracingulate sulcus length is shorter in**  
2                                   **voice-hearers regardless of need for care.**

3  
4                                   Albert R. Powers III\*, M.D., Ph.D.<sup>1†</sup>, Laura I. van Dyck, B.S.<sup>1†</sup>,  
5                                   Jane R. Garrison, Ph.D.<sup>2</sup>, Philip R. Corlett, Ph.D.<sup>1</sup>

- 6  
7  
8                                   1. Department of Psychiatry, Yale University School of Medicine, New Haven, CT,  
9                                   USA  
10                                   2. Department of Psychology, University of Cambridge, Cambridge CB2 8AH, UK

11  
12                                   \*Corresponding author. E-mail: [albert.powers@yale.edu](mailto:albert.powers@yale.edu)

13                                   † These authors contributed equally  
14

## 15 Introduction

16  
17 While hallucinations are often considered to be the *sine qua non* of serious mental  
18 illness, they are commonly experienced by those without a need for care<sup>1</sup>. Such non-  
19 clinical, hallucinating individuals offer a window into the etiology of hallucinations.

20  
21 Garrison et al. (2015) recently assessed structural variability in paracingulate sulcus  
22 (PCS) of medial prefrontal cortex. They found a reduction of 10mm in left hemisphere  
23 PCS length increased the likelihood of hallucinations by 19.9%<sup>2</sup>. However, these  
24 findings were in clinical hallucinators, and reduced leftward asymmetry in PCS has been  
25 repeatedly demonstrated in schizophrenia and associated with reduced reality  
26 monitoring<sup>3</sup>. Similar analyses have been conducted in non-clinical voice hearers and in  
27 those participants, no reduction in PCS length was reported<sup>4</sup>. However, there is  
28 considerable variability in the voice experiences of non-clinical voice hearers. Put  
29 simply, some may be more clinical than others. We recently identified a relatively  
30 homogenous group of non-clinical voice hearers who identify as clairaudient psychics<sup>4</sup>.  
31 Their voice experiences are extremely redolent of those reported by a matched patient  
32 voice hearing group<sup>5</sup> and their brain and behavioral responses to a perceptual inference  
33 task were, at least at the level of prior beliefs, similarly perturbed to patients who hear  
34 voices<sup>6</sup>. These observations are consistent with a continuum model of voice hearing,  
35 along which clairaudient voice hearers are nearer to patients with schizophrenia in  
36 some respects. The PCS data reported by Garrison et al would militate against such a  
37 continuum<sup>4</sup>. Before rejecting the continuum model, we sought to determine if the  
38 differences in PCS length also applied to the clairaudient non-clinical voice hearers.

39  
40 If PCS length is to be developed as a biomarker for clinical hallucination risk, then it is  
41 important to demonstrate that it is not similarly reduced in non-clinical voice hearers.

## 42 43 44 Methods

45  
46 Recruitment, clinical assessment, and image acquisition are detailed in Powers et al.  
47 (2017). The project was approved by the local Institutional Review Board and conducted  
48 in accordance with the Declaration of Helsinki. T1-weighted structural MRI scans were  
49 obtained using 3D MPRAGE sequence for four groups of participants: 1) voice-hearers  
50 with a psychotic disorder (P+H+; n = 15); 2) voice-hearers without a psychotic disorder  
51 (P-H+; n = 15); 3) non-voice-hearers with a psychotic disorder (P+H-; n = 14); and 4)  
52 non-voice-hearers without a psychotic disorder (P-H-; n = 15). All analyses were carried  
53 out blind to participant group.

54  
55 Scans were imported into and calibrated using Mango brain visualization software  
56 (version 3.6). Using sagittal slices, 4mm to the left or right of the medial line, the PCS  
57 was identified and measured following prior work<sup>2</sup>. The full protocol for measuring PCS  
58 length is available here: <https://www.repository.cam.ac.uk/handle/1810/264520>. Briefly,  
59 individual scans were imported as NIFTI folders into Mango brain visualization software  
60 (version 3.6; <http://ric.uthscsa.edu/mango>) and inspected for integrity. In an axial view,

61 the locations of the anterior and posterior commissures (AC and PC) were marked, and  
62 the scan rotated to line up the AC and PC in a horizontal plane. The origin was reset to  
63 the location of the AC. On a sagittal slice, 4.375mm to the left or right of the medial line,  
64 the cingulate sulcus (CS) was identified as the first major sulcus running in an anterior–  
65 posterior direction, dorsal to the corpus callosum and typically visible for five sagittal  
66 slices or more. The PCS was then identified if present as a salient sulcus, running  
67 parallel, horizontal and dorsal to the CS, and visible for three or more sagittal slices  
68 measured from the medial plane ( $x = 0$ ). The sulcus was measured using the ‘trace line’  
69 function in Mango from its start in the first quadrant prescribed by  $y > 0$  and the  
70 horizontal line linking the AC and PC ( $z > 0$ ), starting at the point at which the sulcus ran  
71 in a posterior direction. The PCS was measured to its end point, which could fall outside  
72 of the first quadrant. All analyses were conducted in MATLAB 2014b.

73

## 74 Results

75

76 With two-way ANOVA, there was a main effect of hallucination status—but not  
77 psychosis—on right PCS length, with no interaction of hallucinations and psychosis.  
78 This effect was not seen in the left PCS. Participants with hallucinations exhibited  
79 reduced right PCS length compared to participants without hallucinations (mean  
80 reduction = 8.8 mm,  $P < 0.05$ ). The effect of hallucinations on right PCS length was  
81 sufficiently robust to persist with the addition to the model of the potentially confounding  
82 covariates: age and IQ ( $F = 4.55$ ,  $P < 0.05$ ).

83

84

## 85 Discussion

86

87 While past studies have demonstrated decreased PCS length in individuals with  
88 psychosis and hallucinations compared to their non-hallucinating counterparts<sup>2</sup>, ours is  
89 the first demonstration that such an effect extends to non-treatment-seeking voice-  
90 hearers. Right PCS in our sample was significantly shorter in voice-hearers, regardless  
91 of whether or not they had a diagnosable psychotic illness. In fact, mean right PCS  
92 length was numerically shorter for non-clinical voice-hearers than for any other group,  
93 although this difference did not reach statistical significance. Our findings support the  
94 hypothesis that differences in PCS length are specifically related to the propensity to  
95 hear voices and not to illness, disability, or dysfunction<sup>2</sup>. However, our non-clinical  
96 voice hearers’ experiences were very redolent of those reported by patients with  
97 schizophrenia<sup>5</sup>. It is possible that not all non-clinical voice hearers have experiences—  
98 and, we would argue—brains - that match patients so closely.

99

100 We recently demonstrated a hallucination-specific effect in an adjacent prefrontal region  
101 during conditioned hallucinations<sup>6</sup>. We showed that this region’s activity encodes low-  
102 level perceptual beliefs about the sensory environment that may drive hallucinations. It  
103 may be that the morphological differences highlighted here play a role in mediating  
104 perceptual belief formation or its interactions with incoming sensory evidence during  
105 hallucinations. Recently-identified methods for functional MRI at the resolution of

106 cortical layers (i.e., laminar fMRI<sup>7</sup>) may aid in fully characterizing these links between  
107 PCS morphology and the computational underpinnings of hallucinatory phenomena.  
108

109  
110  
111

## References

112

- 114 1. van Os J, Linscott RJ, Myin-Germeys I, Delespaul P, Krabbendam L. A systematic review  
115 and meta-analysis of the psychosis continuum: evidence for a psychosis proneness-  
116 persistence-impairment model of psychotic disorder. *Psychol Med* Feb 2009;39(2):179-  
117 195.
- 118 2. Garrison JR, Fernyhough C, McCarthy-Jones S, Haggard M, Australian Schizophrenia  
119 Research B, Simons JS. Paracingulate sulcus morphology is associated with  
120 hallucinations in the human brain. *Nat Commun* Nov 17 2015;6:8956.
- 121 3. Buda M, Fornito A, Bergstrom ZM, Simons JS. A specific brain structural basis for  
122 individual differences in reality monitoring. *J Neurosci* Oct 5 2011;31(40):14308-14313.
- 123 4. Garrison JR, Fernyhough C, McCarthy-Jones S, Simons JS, Sommer IEC. Paracingulate  
124 Sulcus Morphology and Hallucinations in Clinical and Nonclinical Groups. *Schizophr Bull*  
125 Jun 18 2019;45(4):733-741.
- 126 5. Powers AR, 3rd, Kelley MS, Corlett PR. Varieties of Voice-Hearing: Psychics and the  
127 Psychosis Continuum. *Schizophr Bull* Jan 2017;43(1):84-98.
- 128 6. Powers AR, Mathys C, Corlett PR. Pavlovian conditioning-induced hallucinations result  
129 from overweighting of perceptual priors. *Science* Aug 11 2017;357(6351):596-600.
- 130 7. Stephan KE, Petzschner FH, Kasper L, Bayer J, Wellstein KV, Stefanics G, Pruessmann KP,  
131 Heinzle J. Laminar fMRI and computational theories of brain function. *Neuroimage* Nov  
132 2 2017.

132

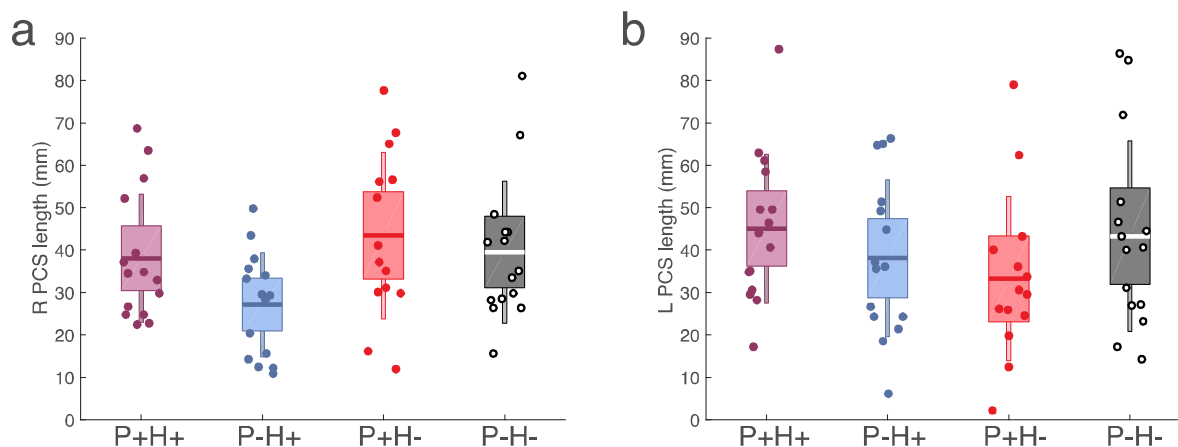

133

134

135 **Figure 1. Paracingulate sulcus (PCS) length.** Right PCS is significantly shorter in  
136 participants with hallucinations than in participants without (a), but this effect is not seen  
137 in left PCS (b).  
138

138
